# Supplementary material for: Superior photoelectrodes for solid-state dye-sensitized solar cells using amphiphilic TiO2
Source: Royal Society of Chemistry journal article supplement (doi:10.1039/c2ta00418f), 2012-11-13
Supplement: c2ta00418f.pdf [file c2ta00418f.pdf]

<SUPPORTING INFORMATION>

# Superior Photoelectrodes for Solid-state Dye-sensitized Solar Cells Using Amphiphilic TiO<sub>2</sub>

*Daesub Hwang<sup>1,2</sup>, Dong Young Kim<sup>1</sup>, Seong Mu Jo<sup>1</sup>, Sung-Yeon Jang<sup>3,\*</sup>, and Dongho Kim<sup>2,\*</sup>*

<sup>1</sup>Optoelectronic Materials Lab, Korea Institute of Science and Technology, Seoul 136-791, Korea

<sup>2</sup>Department of Chemistry, Yonsei University, Seoul 120-749, Korea

<sup>3</sup>Department of Chemistry, Kookmin University, Seoul 136-702, Korea

## CORRESPONDING AUTHOR FOOTNOTE

E-mail: syjang@koomin.ac.kr, Tel: +82- 2- 910-5768, Fax: +82- 2- 910- 4415

## Supporting Information Material

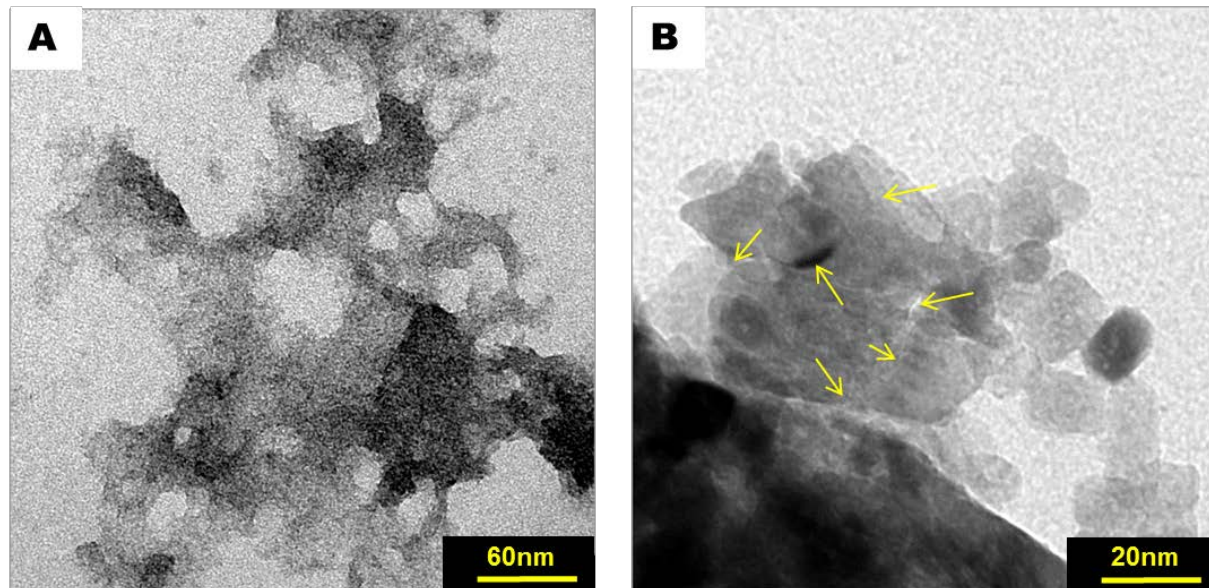

**Figure S1.** TEM images of amorphous titania prepared by hydrothermal synthesis at (A) 80 °C for 16 h and (B) 160 ° for 48 h.

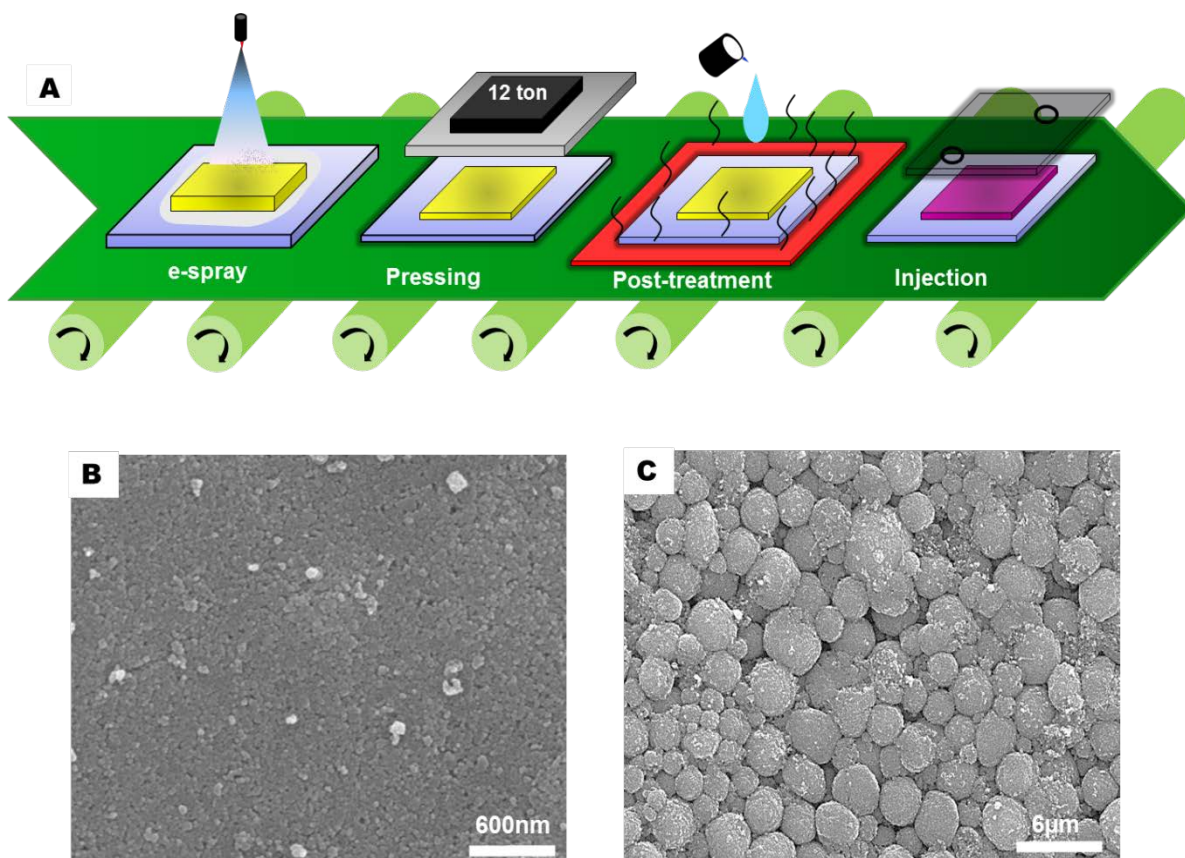

**Figure S2.** (A) Schematic illustration of ss-DSSC fabrication. (B) SEM image of TiO<sub>2</sub>-NP-based photoelectrode. (C) SEM image of TiO<sub>2</sub>-NS-based photoelectrode (laminated).

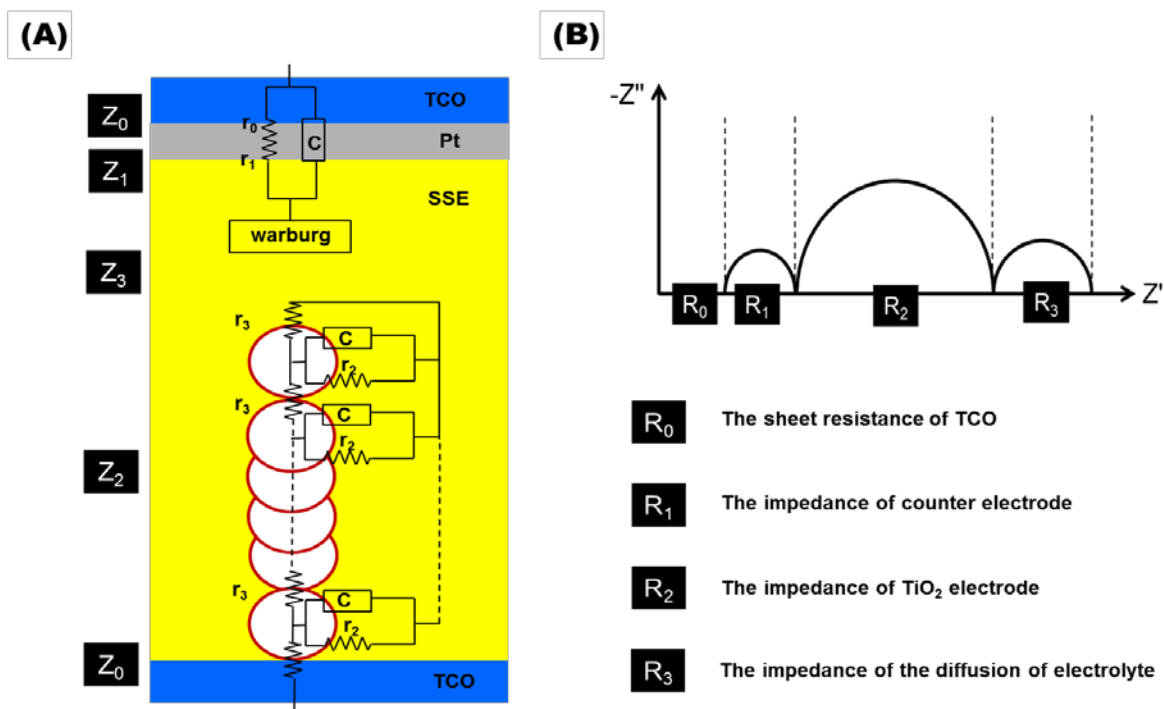

**Figure S3.** (A) Representative electrical equivalent circuit of DSSCs. (B) Ideal ESI plot of a DSSC with the real parts of the impedances  $R_0$ ,  $R_1$ ,  $R_2$ , and  $R_3$ .

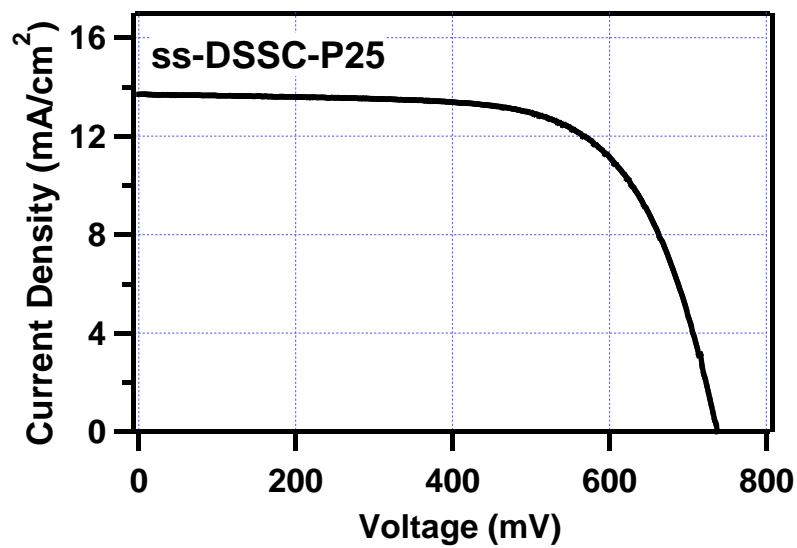

**Figure S4.** *J-V* characteristics of the ss-DSSC-P25 under the conditions of simulated global AM 1.5 solar radiation at  $100 \text{ mW}\cdot\text{cm}^{-2}$ .
